# Supplementary material for: Sponge-like CoNi Catalysts Synthesized by Combustion of Reactive Solutions: Stability and Performance for CO2 Hydrogenation
Source: MDPI journal article supplement (doi:10.3390/ma15155129), 2022-07-23
Supplement: s1 [file s1]

# Sponge-like CoNi Catalysts Synthesized by Combustion of Reactive Solutions: Stability and Performance for CO<sub>2</sub> Hydrogenation

Nikolay Evdokimenko <sup>1,2</sup>, Zhanna Yermekova <sup>1</sup>, Sergey Roslyakov <sup>1,\*</sup>, Olga Tkachenko <sup>2</sup>, Gennady Kapustin <sup>2</sup>, Denis Bindug <sup>1</sup>, Alexander Kustov <sup>1,2,3</sup> and Alexander S. Mukasyan <sup>4,\*</sup>

<sup>1</sup> Center of Functional Nano-Ceramics, National University of Science and Technology “MISIS”, 119049 Moscow, Russia; nikolayevdokimenko@bk.ru (N.E.); ifanna@gmail.com (Z.Y.); denis-bindug@yandex.ru (D.B.); kyst@list.ru (A.K.)

<sup>2</sup> N.D. Zelinsky Institute of Organic Chemistry RAS, 119991 Moscow, Russia; ot113@mail.ru (O.T.); gik@server.ioc.ac.ru (G.K.)

<sup>3</sup> Department of Chemistry, M. V. Lomonosov Moscow State University, 119991 Moscow, Russia

<sup>4</sup> Department of Chemical and Biomolecular Engineering, University of Notre Dame, Notre Dame, IN 46556, USA

\* Correspondence: roslyakov.si@misis.ru (S.R.); amoukasi@nd.edu (A.S.M.)

**Table S1.** XPS average elements content in the outermost surface of the Co-Ni catalysts.

| Catalysts                          | Element content, at. % |      |      |      |      | Co/Ni atomic ratio |
|------------------------------------|------------------------|------|------|------|------|--------------------|
|                                    | O                      | C    | N    | Co   | Ni   |                    |
| Co, as-synthesized                 | 26.0                   | 58.5 | 7.2  | 8.3  | –    | –                  |
| Co <sub>3</sub> Ni, as-synthesized | 23.4                   | 47.3 | 15.5 | 11.6 | 2.2  | 5.2                |
| CoNi, as-synthesized               | 19.0                   | 56.6 | 13.5 | 7.2  | 3.7  | 1.9                |
| CoNi <sub>3</sub> , as-synthesized | 28.5                   | 48.9 | 10.3 | 5.5  | 6.8  | 0.8                |
| Ni, as-synthesized                 | 32.5                   | 52.6 | 8.4  | –    | 6.5  | –                  |
| CoNi <sub>3</sub> , spent          | 35.0                   | 38.6 | –    | 11.1 | 15.3 | 0.7                |
| CoNi, spent                        | 48.4                   | 26.3 | –    | 15.2 | 10.1 | 1.5                |
| Ni, spent                          | 30.0                   | 56.1 | –    | –    | 13.9 | –                  |

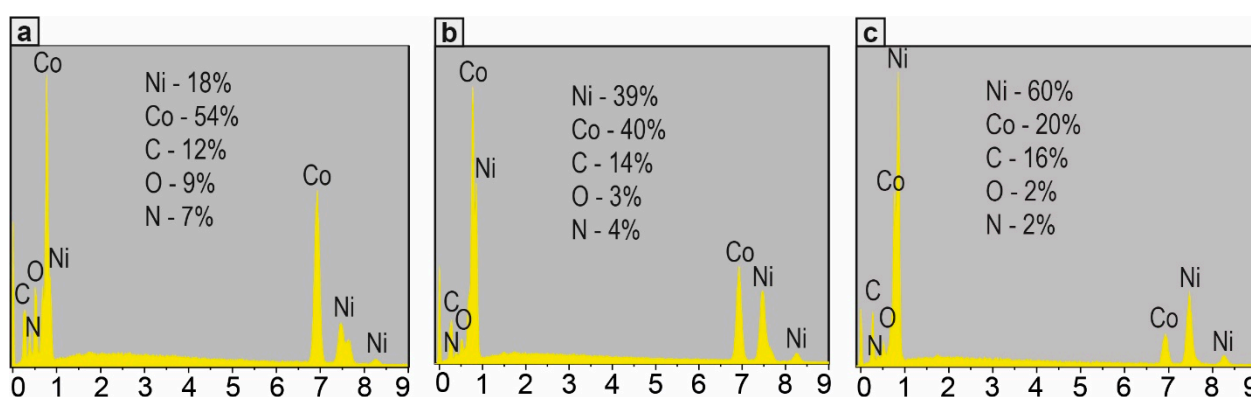

**Figure S1.** EDS spectra of Co<sub>3</sub>Ni (a), CoNi (b), and CoNi<sub>3</sub> (c) catalysts.

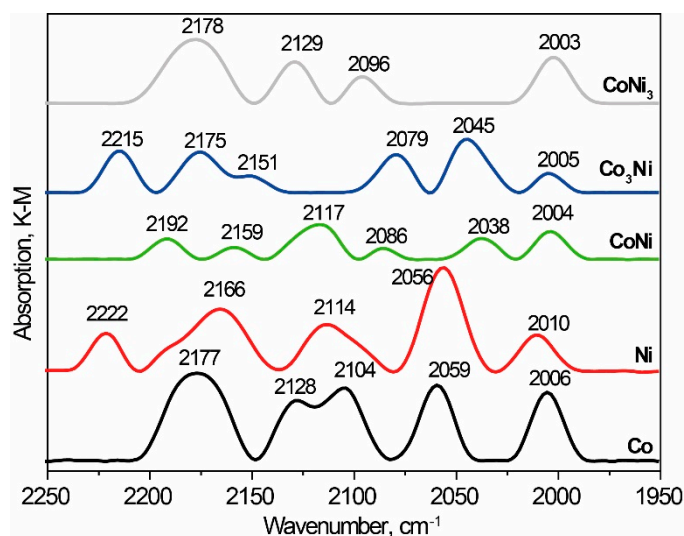

**Figure S2.** DRIFT-CO spectra of single Co, Ni, and bimetallic  $\text{Co}_x\text{Ni}_{1-x}$  catalysts.

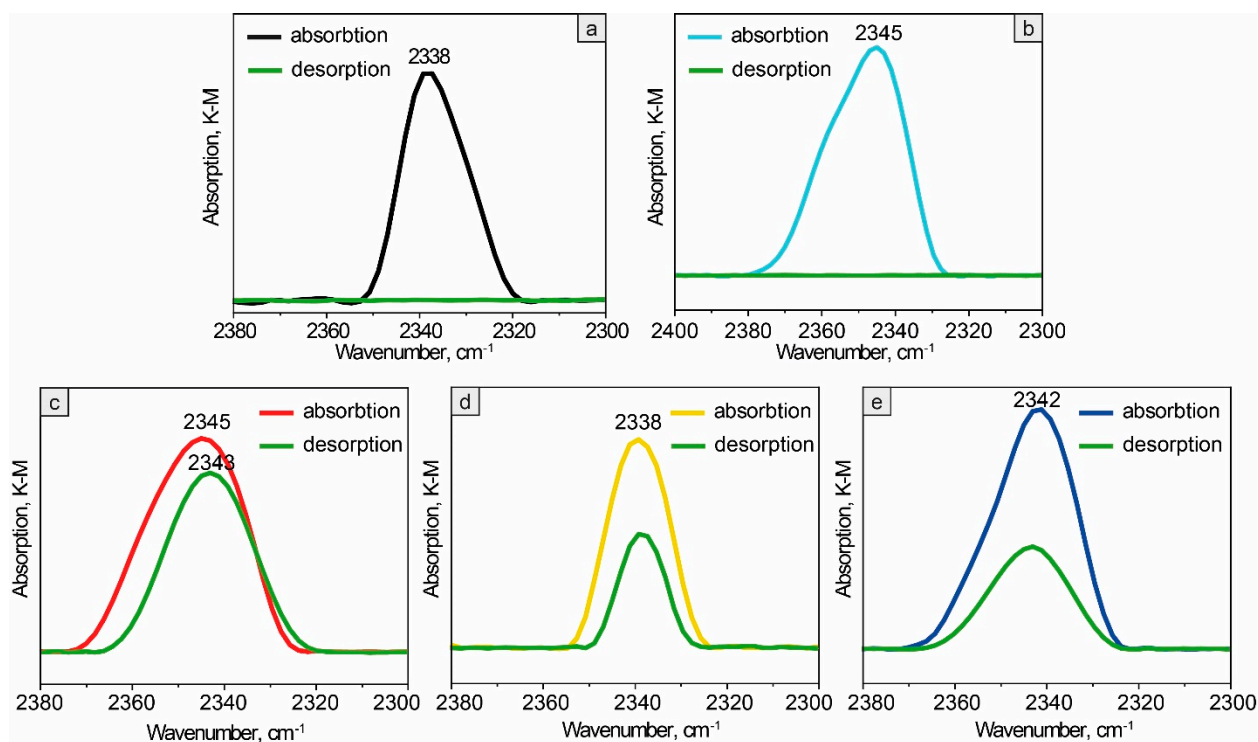

**Figure S3.** DRIFT-CO<sub>2</sub> absorption-desorption spectra of Co (a), Ni (b), Co<sub>3</sub>Ni (c), CoNi (d), and CoNi<sub>3</sub> (e).
